# Supplementary material
Source: publisher site journal article supplement (https://www.spandidos-publications.com/2951/downloadSupplementary)
Supplement: Supplementary file 1 [file downloadSupplementary]

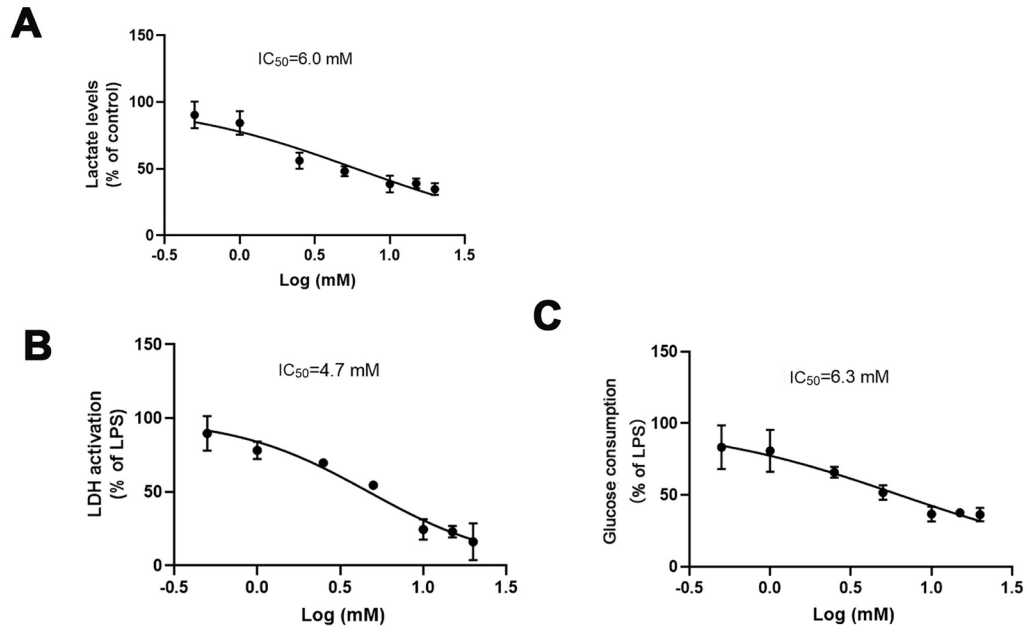

Figure S1. The dose-response curve of metformin on the LPS-exposed pulmonary fibroblasts. Gradient dosage of metformin (0.5, 1.0, 2.5, 5.0, 10.0, 15.0 and 20.0mM) were added into the LPS-exposed pulmonary fibroblasts. The median inhibition concentration (IC<sub>50</sub>) was calculated to estimate metformin on regulating aerobic glycolysis in the LPS-exposed pulmonary fibroblasts. The IC<sub>50</sub> of lactate levels, LDH activation and glucose consumption was 6.0mM (A), 4.7mM (B), and 6.3mM (C), respectively.
